# Supplementary material for: A Novel Selenium Polysaccharide Alleviates the Manganese (Mn)-Induced Toxicity in Hep G2 Cells and Caenorhabditis elegans
Source: MDPI journal article supplement (doi:10.3390/ijms23084097), 2022-04-07
Supplement: s1 [file s1]

**Supplementary Table S1.** Primers used for RT-qPCR.

| Genes           | Primers |                                  |
|-----------------|---------|----------------------------------|
| <i>sod-3</i>    | Forward | 5'-ATTCGCCAACCCATGATGG-3'        |
|                 | Reverse | 5'-GCTCCCAAACGTCAATTCCA-3'       |
| <i>daf-16</i>   | Forward | 5'-TTTCCGTCCCCGAACTCA-3'         |
|                 | Reverse | 5'-ATTCGCCAACCCATGATGG-3'        |
| <i>act-1</i>    | Forward | 5'-CCAGGAATTGCTGATCGTATGCAGAA-3' |
|                 | Reverse | 5'-TGGAGAGGGAAGCGAGGATAGA-3'     |
| <i>ctl-2</i>    | Forward | 5'-TTCGCTGAGGTTGAACAATCCG-3'     |
|                 | Reverse | 5'-GTTGCTGATTGTCATAAGCCATTGC-3'  |
| <i>ctl-1</i>    | Forward | 5'-TTTCAACGGTCGCTGGAGAA-3'       |
|                 | Reverse | 5'-AGTCTGTGGATTGCGCTTCA-3'       |
| <i>hsp-16.2</i> | Forward | 5'-CTGCAGAATCTCTCCATCTGAGTC-3'   |
|                 | Reverse | 5'-AGATTCTGAAGCAACTGCACC-3'      |
| <i>hsf-1</i>    | Forward | 5'-TTGACGACGACAAGCTTCCAGT-3'     |
|                 | Reverse | 5'-AAAGCTTGCACCAGAATCATCCC-3'    |
| <i>gst-1</i>    | Forward | 5'-CCCTCAAGCTCACGTACTTC-3'       |
|                 | Reverse | 5'-AGCGAGATGACGGATGATAG-3'       |
| <i>gst-4</i>    | Forward | 5'-TCCGTCAATTCACTTCTTCCG-3'      |
|                 | Reverse | 5'-AAGAAATCATCACGGGCTGG-3'       |
| <i>age-1</i>    | Forward | 5'-CCTGAACCGACTGCCAATC-3'        |
|                 | Reverse | 5'-GTGCTTGACGAGATATGTGTATTG-3'   |
| <i>pdh-1</i>    | Forward | 5'-ATCGCGGAGACCCATTTGTT-3'       |
|                 | Reverse | 5'-AACAGGAACATTCGGCGTCT-3'       |
| <i>sgk-1</i>    | Forward | 5'-CACCGACTTTGGGCTCTGTAA-3'      |
|                 | Reverse | 5'-CTTGAGACGAAGTGGCTGGTT-3'      |
| <i>skn-1</i>    | Forward | 5'-AGTGTTCGGCGTTCCAGATTTC-3'     |
|                 | Reverse | 5'-GTCGACGAATCTTGCGAATCA-3'      |
| <i>akt-2</i>    | Forward | 5'-ACATTCAGCGAAGCACGAACA-3'      |
|                 | Reverse | 5'-TACATGACCACTCCGACTCCC-3'      |
| <i>daf-2</i>    | Forward | 5'-GCGGATACACAGCAAGAATAAC-3'     |
|                 | Reverse | 5'-GAGCCACAAGCACCAGAAC-3'        |

**Supplementary Table S2.** The survival times of different strains under Mn stress.

| Stains                          | Treatment               | Mean survival time (h) |
|---------------------------------|-------------------------|------------------------|
| N2                              | Mn                      | 14.00±0.000            |
|                                 | Mn + Se-PCS (0.1 mg/mL) | 14.33±1.528            |
|                                 | Mn + Se-PCS (0.2 mg/mL) | 14.67±1.155            |
|                                 | Mn + Se-PCS (0.3 mg/mL) | 18.67±1.155            |
|                                 | Mn + Se-PCS (0.4 mg/mL) | 16.33±2.082            |
|                                 | Mn + Se-PCS (0.5 mg/mL) | 17.00±1.000            |
| CF1038<br><i>daf-16(mu86)</i>   | Mn                      | 13.00±1.000            |
|                                 | Mn + Se-PCS (0.3 mg/mL) | 12.67±1.155            |
| CB1370<br><i>daf-2(e1370)</i>   | Mn                      | #                      |
|                                 | Mn + Se-PCS (0.3 mg/mL) | #                      |
| TJ1052<br><i>age-1(hx546)</i>   | Mn                      | 13.33±1.155            |
|                                 | Mn + Se-PCS (0.3 mg/mL) | 13.67±1.528            |
| VC204<br><i>akt-2(ok393)</i>    | Mn                      | 22.33±0.577            |
|                                 | Mn + Se-PCS (0.3 mg/mL) | 22.00±1.000            |
| VC345<br><i>sgk-1(ok538)</i>    | Mn                      | 14.67±1.155            |
|                                 | Mn + Se-PCS (0.3 mg/mL) | 19.67±0.577            |
| EU1<br><i>skn-1(zu67)</i>       | Mn                      | 12.67±1.155            |
|                                 | Mn + Se-PCS (0.3 mg/mL) | 12.33±0.577            |
| GR1307<br><i>daf-16(mgDf50)</i> | Mn                      | 14.00±0.000            |
|                                 | Mn + Se-PCS (0.3 mg/mL) | 14.67±1.155            |

Note: # means the survival time was longer than 24 h, and after 40 h stress, the survival rate was still higher than 65%.
